# Supplementary material
Source: Springer Nature journal article supplement (https://www.springermedizin.de/resource/supplementary/13075_2011_3201_MOESM1_ESM.pdf/9693994)

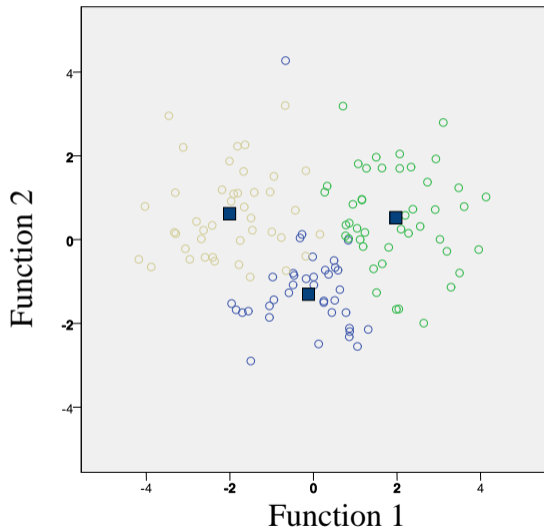

- Cluster 1
- Cluster 2
- Cluster 3
- Group Centroid

Supplement: MOESM1 [file 9693994]
